# 1 Swarming bacteria undergo localized dynamic 2 phase transition to form stress-induced biofilms

3  
4 Iago Grobas<sup>1</sup>, Marco Polin<sup>1,2,3,\*†</sup> & Munchiro Asally<sup>4,5,6,\*†</sup>

5 <sup>1</sup>Warwick Medical School; <sup>2</sup>Centre for Mechanochemical Cell Biology; <sup>3</sup>Physics Department; <sup>4</sup>Bio-Electrical  
6 Engineering Innovation Hub; <sup>5</sup>Warwick Integrative Synthetic Biology Centre; <sup>6</sup>School of Life Sciences,  
7 University of Warwick, Coventry, CV4 7AL, UK

8 †Equal contribution

9 \*Correspondence should be addressed to [m.polin@warwick.ac.uk](mailto:m.polin@warwick.ac.uk) or [m.asally@warwick.ac.uk](mailto:m.asally@warwick.ac.uk)

## 10 11 **Summary**

12 Self-organized multi-cellular behaviors enable cells to adapt and tolerate stressors to a greater degree  
13 than isolated cells. However, whether and how cellular communities alter their collective behaviors  
14 adaptively upon exposure to stress is largely unclear. Here we address this question using *Bacillus*  
15 *subtilis*, a model system for bacterial multicellularity. We discover that, upon exposure to a spatial  
16 gradient of kanamycin, swarming bacteria activate matrix genes and transit to biofilms. The initial stage  
17 of this transition is underpinned by a stress-induced multi-layer formation, emerging from a biophysical  
18 mechanism reminiscent to motility-induced phase separation (MIPS). The physical nature of the  
19 process suggests that stressors which suppress the expansion of swarms would induce biofilm  
20 formation. Indeed, a simple physical barrier also induces a swarm-to-biofilm transition. Based on the  
21 gained insight, we propose a promising strategy of antibiotic treatment to effectively inhibit the  
22 transition from swarms to biofilms by targeting the localized phase transition.

## 23 24 **Keywords**

25 Physical Biology; Quantitative Biology; Swarming; Biofilms; Motility-Induced Phase Separation;  
26 Active Matter

## 27 **Introduction**

28 The ability to sense, respond and adapt to varieties of chemical, physical and environmental stresses is  
29 fundamental to the survival of organisms. In addition to general stress-response pathways at individual  
30 cell level, which activate target genes in response to a variety of stresses, multi-cellular systems can  
31 tolerate stresses through self-organization, the emergence of order in space and time resulting from  
32 local interactions between individual cells (Karsenti, 2008; Wedlich-Söldner and Betz, 2018). Bacterial  
33 biofilm formation and swarming are ancient forms of multicellular adaptation (De la Fuente-Núñez et  
34 al., 2013; Lyons and Kolter, 2015), where cells can coordinate their behaviors through chemical  
35 (Daniels et al., 2004; Xavier, 2011), mechanical (Be'er and Ariel, 2019; Mazza, 2016) and bioelectrical  
36 (Benarroch and Asally, 2020; Prindle et al., 2015) interactions. Biofilm cells are much more tolerant to  
37 various stresses than the genetically identical cells in isolate (Meredith et al., 2015), owing to the  
38 physicochemical properties of extracellular polysubstance (EPS) (Flemming and Wingender, 2010),  
39 metabolic coordination (Liu et al., 2015), slow cell growth (Costerton, 1999), and in the case of air-  
40 exposed biofilms, diffusion barrier by archetypical wrinkled morphology (Epstein et al., 2011;  
41 Vlamakis et al., 2013). Swarming bacteria can also collectively tolerate the antibiotic treatments that  
42 are lethal to individual cells -albeit only to a lesser degree than biofilms- through motility-induced  
43 mixing and reduced small-molecule uptake (Bhattacharyya et al., 2020; Butler et al., 2010; Kearns,  
44 2010; Lai et al., 2009).

45  
46 Swarming is a rapid mode of surface colonization (Kearns, 2010), and therefore its ability to withstand  
47 high antibiotic concentrations could lead to the subsequent establishment of highly resilient biofilms in  
48 regions that could not otherwise have been formed. The formation of biofilms is linked to general stress  
49 response pathways (Lories et al., 2020; Nadezhdin et al., 2020) and can be induced, from planktonic  
50 cells, by a wide range of biochemical and mechanical stressors, such as aminoglycoside antibiotics  
51 (Hoffman et al., 2005), redox-active compounds (Wang et al., 2011), nutrient depletion (Zhang et al.,  
52 2014) and mechanical stress (Chu et al., 2018). However, whether swarming collectives may transit  
53 into more resilient biofilms upon exposure to stressors, and if so, how such a transition can be initiated  
54 within a self-organized swarm, are unknown.

55  
56 Biophysics of collective motion in bacteria, such as flocking and swarming, is a major topic within the  
57 rapidly growing research area of active matter (Bechinger et al., 2016; Geyer et al., 2019; Vicsek et al.,  
58 1995). Theoretical models of active matter have repeatedly predicted that, at a sufficient concentration,  
59 a collection of motile particles can spontaneously form high-density clusters of particles (Barré et al.,  
60 2015; Gonnella et al., 2015). Indeed, this process has been implicated in the development of cell  
61 inhomogeneities leading to fruiting-body formation in *M. xanthus* (Liu et al., 2019). This transition,  
62 known as Motility Induced Phase Separation (MIPS), is based on feedback between the decrease in  
63 particles' speed at high concentration, caused by physical interactions, and the spontaneous  
64 accumulation of active particles in the places where their speed is lower (Gonnella et al., 2015). When  
65 the particles' speed is sufficiently high and their concentration is in the appropriate range (typical  
66 volume fractions of 0.3-0.8 or 0.6-0.7 for round or rod-shaped particles, respectively (van Damme et  
67 al., 2019; Digregorio et al., 2018)), inherent density fluctuations are amplified by the particles' slowing  
68 down, and the system effectively phase separates into high-density/low-motility clusters surrounded by  
69 a low-density/high-motility phase (Cates and Tailleur, 2015).

70  
71 The theory of MIPS, then, suggests that persistent heterogeneity in cell density -the MIPS clusters- can  
72 develop spontaneously when both cell speed and density are appropriate (Fig.1, grey U-shape region)  
73 (Cates et al., 2010). Such conditions should be achievable within a bacterial swarm. Given that cell-  
74 density heterogeneity can lead to the production of matrix and biofilm formation mediated by localized  
75 cell death (Asally et al., 2012; Ghosh et al., 2013), we hypothesized that the heterogeneity caused by  
76 putative MIPS-like clusters could in turn underpin the transition from bacterial swarms into biofilms  
77 (Fig. 1). As MIPS-like clustering is an emergent phenomenon arising from physical interactions  
78 between individual agents, it may endow swarms with a collective response to a wide spectrum of

79 stressors that cause changes in cell motility and/or density.

80  
81 Here we show that *Bacillus subtilis* swarms can indeed transit into biofilms through a MIPS-like  
82 process, induced by physical or chemical stresses applied at the swarming front. When swarming cells  
83 are exposed to kanamycin, they activate the expression of the biofilm matrix operon, *tapA-sipW-tasA*,  
84 and eventually develop wrinkled biofilms. The transition initiates by a localized phase transition where  
85 the expanding swarming monolayer generates multilayer clusters of cells as a consequence of motility  
86 and stress-induced elevation of cell density. Based on the insights gained from our investigation, we  
87 show that targeting the multi-layered region by administering a given amount of antibiotic in two  
88 separate doses is effective in suppressing the formation of biofilms from swarming cells.

89  
90

## 91 **Results**

### 92 **Swarming *B. subtilis* transits into a biofilm in presence of a spatial kanamycin gradient**

93 To examine if a stressor triggers biofilm formation from a swarming collective, we performed swarming  
94 assays using *B. subtilis* with a spatial gradient of the aminoglycoside kanamycin. Specifically, a disk  
95 containing 30  $\mu\text{g}$  of kanamycin was placed on the side of a swarming plate (0.5% agar) and allowed to  
96 rest for 24 hours to establish a space-dependent antibiotic concentration profile (Fig. 2a and S1). An  
97 inoculum of *B. subtilis* culture was then placed at the center of the dish,  $\sim 4$  cm away from the kanamycin  
98 source, and the plate was imaged while being kept at 30°C (Fig. 2a). After  $\sim 2$  hours of lag period, the  
99 cells formed a rapidly expanding swarming front ( $\sim 4$  mm/h), which became progressively slower  
100 towards the source of kanamycin until it completely stopped  $\sim 0.3$  cm away from the disk (Fig. S2 and  
101 Supplementary Video 1). After further incubation at 30°C for 36 hours, the colony developed prominent  
102 wrinkles, the morphological hallmark of pellicles and colony biofilms (Cairns et al., 2014; Vlamakis et  
103 al., 2013), across a  $\sim 3$  mm band  $\sim 1.3$  cm away from the kanamycin disk (Fig. 2b). The estimated level  
104 of kanamycin at the site was nearly half the minimum inhibitory concentration (MIC) (Fig. S1). To  
105 quantify the degree of biofilm formation, we measured the characteristic wavelength and roughness of  
106 the wrinkles, which have been reported to correlate with biofilm stiffness (Asally et al., 2012; Kesel et  
107 al., 2016; Yan et al., 2019). The wrinkles appearing near the kanamycin disk had a wavelength of  $\lambda =$   
108  $560 \mu\text{m}$  and roughness  $r = 10$ , while those without kanamycin only produced a faint small-wavelength  
109 surface roughness ( $\lambda = 91 \mu\text{m}$ ,  $r = 5.5$ ; Fig. S3).

110  
111 To verify the association of these wrinkles to biofilms, we repeated the assay using  *$\Delta eps$* , a mutant  
112 known to be impaired in biofilm formation (Nagórska et al., 2010) but capable of swarming  
113 (Supplementary Video 2), and confirmed no wrinkles with this mutant (Fig. 2c). Furthermore, we  
114 measured the expression of TasA, an essential matrix component for *B. subtilis* biofilm formation  
115 (Romero et al., 2010), using a strain carrying  $P_{tapA}$ -*yfp*, a fluorescence reporter for the expression of  
116 *tapA-sipW-tasA* operon (Vlamakis et al., 2008). The result showed an upregulation of the promoter  
117 activity when swarming cells are exposed to kanamycin (Fig. 2e), indicating that the kanamycin  
118 activates the matrix gene and induce biofilm formation in a swarming colony on a soft-agar plate.

119  
120 The emergence of wrinkles across a  $\sim 3$  mm band away from kanamycin suggests that the swarm-to-  
121 biofilm transition corresponds to exposure to a certain concentration range of kanamycin. Indeed,  
122 increasing the initial concentration of antibiotic in the disk, wrinkles emerged further away from it (Fig.  
123 S4), while a disk without antibiotic did not promote wrinkle formation (Fig. 2d). Intriguingly, on hard  
124 agar plates (1.5%) typically used for biofilm assays, wrinkles were only induced to a lesser extent than  
125 in the swarming case (Fig. S5). The fact that a kanamycin gradient promotes wrinkle formation in a  
126 swarming colony, but not in a non-motile culture, pointed to a fundamental role played by cell motility  
127 and suggested the need to investigate the swarming dynamics in detail.

128  
129

130 **The emergence of the biofilm is templated by a transition from mono- to multi-layers localized at**  
131 **swarming front**

132 To investigate the potential link between swarming dynamics and biofilm formation, we characterized  
133 the swarming dynamics at the single-cell level, with and without a kanamycin gradient. We combined  
134 time-lapse imaging at both microscopic (10×; 30 fps) and macroscopic (2×; 0.006 fps) scales to capture  
135 both swarming, which is microscopic and fast (~70  $\mu\text{m}^2$  cell rafts; speed ~60  $\mu\text{m}/\text{s}$ ), and biofilm  
136 formation, which occurs at a macroscopic scale over hours to days. For the microscopic imaging, we  
137 focused on the cells at ~1 cm from the kanamycin disk, where wrinkles eventually appear and  
138 kanamycin level is below MIC (Fig. S1). The cells displayed typical swarming dynamics during the  
139 expansion of the colony front (Fig. 3a). As time progressed we observed the local surface coverage of  
140 the monolayer swarm to progressively increase from initial values of ~20% to  $\geq 60\%$ , at which point  
141 the swarming rafts started displaying jamming events lasting ~1-2 sec, during which groups of cells  
142 protruded temporarily from the swarming monolayer (typical size of jammed group ~500  $\mu\text{m}^2$ , see  
143 Supplementary Video 3 and Figs. 3a,b).

144  
145 The jamming of aligned rafts has been predicted numerically for elongated self-propelled particles on  
146 a plane (Peruani et al., 2011; Weitz et al., 2015) although in that case the planar confinement precluded  
147 any possible excursion in the third dimension. With a slight further increase in local cell density, the  
148 temporary jams led to permanent isolated multi-layered regions, which we call ‘islands’, typically  
149 ~27,000  $\mu\text{m}^2$  in size and with constantly fluctuating boundaries (Fig. 3b inset, Supplementary Video  
150 4). The islands did not appear to be related to any evident inhomogeneity of the underlying agar. Within  
151 islands, cells were highly dynamic and appeared to meander across the layers albeit at a reduced speed.  
152 Cell movement within islands (Fig. S7, Supplementary Video 5) highlights the fact that these islands  
153 are formed by actively motile cells, rather than groups of immotile bacteria which spontaneously  
154 separate from the monolayer. In particular, we did not find any evidence for clusters of immotile cells  
155 templating the islands. Rather, motile cells were constantly exchanged between the multilayer and the  
156 surrounding monolayer. Following a continuous increase in cell density with time, islands grew in size  
157 and merged with each other, eventually forming a much larger multi-layered region (Fig. 3c, Fig S7,  
158 Supplementary Video 6). The nucleation and merging of islands were observed up to 4 layers before  
159 we lost the ability to recognize further transitions due to a flattening of the image contrast (Fig. S7).

160  
161 The formation of islands was also observed by macroscopic time-lapse imaging. In absence of  
162 kanamycin, islands emerged simultaneously throughout the plate, forming an intricate granular pattern  
163 with a typical size of ~2,000  $\mu\text{m}^2$  (Fig. 3d), a phenomenology reminiscent of spinodal decomposition  
164 in binary fluids (Qiu et al., 2001). In contrast, the process of islands formation and growth was markedly  
165 different in presence of kanamycin (Fig. 3e). Following the halt of the swarming front expansion due  
166 to inhibition by the antibiotic, well-defined, distinct islands emerged well separated and only within a  
167 ~5mm-wide band just inside the arrested swarming front, and then grew with a strongly anisotropic  
168 pattern oriented transversally to the front of the swarm (Video S6). This phenomenology is reminiscent  
169 of a binodal -rather than spinodal- liquid-liquid phase separation in a temperature gradient (Bartolini et  
170 al., 2019) which here might reflect a kanamycin-induced speed gradient. The latter macroscopic cell-  
171 density heterogeneity resulted in the subsequent formation of biofilm wrinkles, ~1 cm away from the  
172 disk (Fig. 2b).

173  
174 Since quorum sensing is often associated with bacterial collective behavior, we wondered if quorum  
175 sensing may play a role in the emergence of islands and the ensuing multilayer. We therefore repeated  
176 the experiments with  $\Delta\text{phrC}$  and  $\Delta\text{opp}$  mutant strains, lacking the Phr quorum-sensing system in *B.*  
177 *subtilis* but still capable of swarming. In both cases, we observed the wild-type phenomenology of  
178 wrinkled biofilms and the emergence of islands (Fig. S8). The results indicated that this quorum-sensing  
179 system is not responsible for the multi-layer transition, suggesting that exposure to kanamycin can  
180 promote cell-density heterogeneity by multi-layer islands formation in a quorum-sensing independent  
181 manner.

182

### 183 **Transition from monolayer to multilayer resembles motility induced phase separation**

184 To address the mechanism of multi-layer formation, we wondered if physical stresses may be  
185 responsible for this emergent collective behavior since single-to-multi layer transitions have been  
186 reported for confined bacterial aggregates, either growing or gliding, as a consequence of build-up of  
187 internal mechanical stresses (Grant et al., 2014; Su et al., 2012). In particular, we considered if the  
188 active matter model of MIPS for rod-shape particles (Cates and Tailleur, 2015) could act as a useful  
189 paradigm for understanding the emergence of multi-layer regions. We therefore mapped our  
190 experimental results onto the typical phase space considered when studying MIPS transitions, where  
191 an active 2-dimensional system is characterized by its surface coverage,  $\phi$ , and its rotational Péclet  
192 number,  $Pe_r = u/LD_r$ . The latter is defined in terms of the average speed  $u$ , characteristic size  $L$ , and  
193 rotational diffusivity  $D_r$  of the active particles. MIPS clusters are expected within a U-shaped region  
194 characterized by a sufficiently large  $Pe_r$  and a range of surface coverages that, for rod-like particles like  
195 *B. subtilis*, is pushed to values higher than the ~50%, typical of circular particles, due to antagonistic  
196 effects of cell-to-cell alignment (Fig. 4a, grey U-shape region shows the prediction for aspect ratio 2  
197 from (van Damme et al., 2019)). We then quantified the cell density (surface coverage,  $\phi$ ) and the  
198 rotational Péclet number from the different stages of the swarming process. Figure 4a shows these two  
199 quantities for cells in the monolayer (blue dots) and for bacterial jams (red dots). While bacteria in the  
200 monolayer corresponded overwhelmingly to points well outside the MIPS region (Fig. 4a blue dots),  
201 bacterial jams -the first stage in the development of stable multilayer islands- clustered around the area  
202 predicted for MIPS in two-dimensional self-propelled rods (Fig. 4a, red dots; MIPS region from (Grant  
203 et al., 2014)). Jamming events were also characterized by a sudden drop in cells' speed (Fig. 4b and  
204 Supplementary Video 3), consistent with the basic premise of MIPS. Altogether, these results show that  
205 the mechanism leading to the development of multilayered islands is compatible with the MIPS process  
206 in active matter. Having established the similarities between MIPS and multilayer formation in the  
207 swarm, it is important to test the ability of the model to predict the results of new experiments.

208

### 209 **Local accumulation of swarming cells induces multilayer transition and biofilm formation**

210 The MIPS paradigm makes the experimentally testable prediction that it should be possible to induce  
211 multilayer formation by altering the local density of motile cells, thereby forcing the system to enter  
212 the MIPS region in phase space (Fig. 4a, shaded region). We tested this in two ways: by UV irradiation,  
213 and through the use of a physical barrier to block front expansion. Near-UV light can decrease cell  
214 speed in gram-negative bacteria like *E. coli* and *S. marcescens* (Krasnopeevea et al., 2019; Yang et al.,  
215 2019), as well as, as we report here, in *B. subtilis* (Fig. S9a). Locally slowing down motility by light  
216 can lead to a local increase in cell concentration through the accumulation of cells from non-irradiated  
217 regions (Fig. 4c). We first verified that the illumination by UV light itself does not induce a multilayer  
218 transition, by illuminating an area >200-fold greater than the field of view. This prevented cells outside  
219 of the irradiated area from accumulating within the field of view during the experiment. Accordingly,  
220 the surface coverage increased only marginally ( $\phi \approx 0.45$  to  $\phi \approx 0.47$  in 3 min; Fig. S9a). The UV  
221 illumination caused an initial sudden drop in average speed from 65  $\mu\text{m/s}$  to 50  $\mu\text{m/s}$  (Fig. S9a),  
222 followed by a nonlinear progressive slow down over the course of 3 min. Within the phase space picture  
223 (Fig. 4a, Fig. S9b), this corresponds to a trajectory that essentially just moves towards progressively  
224 lower values of  $Pe_r$ . This should not lead to either jams or island formation, which in fact were never  
225 observed (Fig. 4a, Fig. S9b).

226

227 We next illuminated a region of size similar to the field of view. This arrangement allowed cells from  
228 the outer region to accumulate within the field of view due to UV-induced slow-down, a phenomenon  
229 which is a direct consequence of the active, out-of-equilibrium nature of the swarm with no counterpart  
230 in statistical systems in equilibrium (Arlt et al., 2018; Cates, 2012; Frangipane et al., 2018). As a  
231 consequence, the cell density increased significantly ( $\phi \approx 0.42$  to  $\phi \approx 0.7$  in 2 min; Fig. 4c). For the  
232 first ~2 min, the average drop in cell speed was likely compensated by the density increase. It is well  
233 known, in fact, that cell density can enhance swarming motility through cooperative raft formation

234 (Be'er and Ariel, 2019; Jeckel et al., 2019). Eventually, however, the increase in cell density resulted  
235 first in the formation of jams and finally of multi-layer islands (Fig. 4c, Supplementary Video 7). Figure  
236 4d shows the trajectories followed by the irradiated swarms in phase space. Jamming of swarming cells,  
237 the first step in island formation, occurs only for cell densities within a range that compares very well  
238 with predictions by MIPS for self-propelled rod-like particles (Fig. 4d shaded region and (van Damme  
239 et al., 2019)). These results provide a direct support to the hypothesis that a biophysical MIPS-like  
240 process underpins the transition from swarming monolayers to multilayers in *B. subtilis*.

241  
242 To further examine if a local cell-density increase is sufficient by itself to induce a localized transition  
243 from monolayer to multilayer, we used a physical barrier to impede the advance of the swarm and locally  
244 increase cell density. Again, consistently with the MIPS picture, the arrest of the swarm front led to an  
245 increase in cell density and the subsequent emergence of multi-layer islands near the barrier  
246 (Supplementary Video 8). After 36 hours of further incubation, wrinkles developed near the physical  
247 barrier precisely in the region where the islands had started to appear initially (Fig. 5a).

248  
249 Altogether, these results strongly support that *B. subtilis* swarms can undergo a single-to-multi-layer  
250 transition driven principally by a physical mechanism compatible with MIPS, which can be either  
251 global and spinodal-like, or localized and binodal-like. When this transition is localized, regardless of  
252 it being caused by antibiotics or physical confinements, the resultant macroscopic cell-density  
253 heterogeneity determines the emergence of wrinkled biofilms.

### 254 255 **Sequential administration of antibiotics suppresses the emergence of biofilms from swarms**

256 While more complex signaling pathways regulating biofilm matrix production are likely involved in  
257 the passage from localized multi-layers to wrinkles, our results suggest that altering the expansion  
258 dynamics of a swarm promotes biofilm formation. This implies that exposing bacterial swarms to  
259 stressors, such as kanamycin, physical barrier and UV light, may inadvertently increase their resilience  
260 by promoting the formation of biofilms that are much more difficult to eradicate. This is difficult to  
261 prevent by simply increasing the amount of antibiotics. In fact, when we used a ~7-fold greater dose of  
262 kanamycin in the diffusion disk (200  $\mu\text{g}$ ), wrinkles still appeared on the plate, although at a greater  
263 distance from the disk (Fig. S4). However, our findings suggest that the multi-layer band could be a  
264 good target for antibiotic treatment aimed at suppressing the emergence of biofilms. Such multilayer  
265 band happens at a concentration of antibiotic that bacteria can tolerate since the cells are still motile (in  
266 our case ~0.5 MIC; see Fig. S6, Supplementary Video 5). We therefore wondered if a two-step  
267 sequential antibiotic administration could prevent biofilm formation, where the first administration  
268 induces multilayer formation and the second targets the multilayer area before completing biofilm  
269 formation. To test this conjecture, we decided to administer a total amount of 200  $\mu\text{g}$  of kanamycin in  
270 two steps, an initial one when placing the disk on the plate, and the second as the swarming front  
271 stopped (Fig. 5b, Fig. S10). The emergence of wrinkles was greatly suppressed when kanamycin was  
272 administrated sequentially, despite keeping the total amount of antibiotic constant (Fig. 5b,c and Fig.  
273 S10). The effect was most evident when the second dose was greater than the first. These results thus  
274 propose a promising strategy for treating bacterial collectives with aminoglycoside while minimizing  
275 the emergence of biofilms.

### 276 277 278 **Discussion**

279 This work reveals a biophysical mechanism underpinning the initial stage of the collective stress-  
280 induced transition from swarms to biofilm in *B. subtilis* governed by motility and cell density. This is  
281 based on the halting of swarming expansion, which promotes the accumulation of cells at the front,  
282 resulting in the formation of MIPS-like multi-layered islands. Upon exposure to the aminoglycoside  
283 kanamycin, the swarming colony activates the *tapA-sipW-tasA* operon and eventually develops a  
284 wrinkled biofilm morphology. Consistent with this view, we demonstrate that qualitatively different  
285 stressors, from antibiotics to UV and physical confinement, can all induce formation of islands.

286 Moreover, based on our findings, we show that a sequential monotherapy can be effective in preventing  
287 biofilm formation from a swarming colony in *B. subtilis*. As the underpinning mechanism of the  
288 transition is an emergent phenomenon driven by physical interactions between swarming cells, we  
289 believe similar transitions should also happen in other bacterial species. It would be interesting, for  
290 example, to examine if swarms of clinically relevant bacteria, such as *Pseudomonas aeruginosa* and  
291 *Salmonella enterica*, may also transit into biofilms through a similar process. Such investigations would  
292 be an important step forward to see if sequential administrations could be effective in preventing stress-  
293 induced biofilm formation also in pathogenic bacteria.

294  
295 This study addresses a fundamental question about the mechanism by which cell collectives adapt their  
296 behavior in response to various physical and chemical stresses. In the present case, a local cell-density  
297 increase caused by the halting of the swarming front, may be part of a general collective stress response  
298 mechanism, which triggers a switch in the collective behavior from swarming to biofilm. Such a stress  
299 response mechanism at the collective level could allow the swarming colony to develop biofilms in  
300 response to various stressors, regardless of the stressors' exact molecular mode of action. We expect  
301 that further research will determine whether this form of environmental sensing and adaptation of cell  
302 collectives via cell-density increase is common to other biological systems. Interestingly, this idea is in  
303 line with recent advancements in the understanding of mechanochemical feedback in development and  
304 disease, where local cell density can determine the fates of cell collectives (Hannezo and Heisenberg,  
305 2019). The connection we discovered could represent a primitive example of a collective  
306 mechanochemical feedback loop, underpinned by one of the most fundamental types of emergent  
307 phenomena (MIPS) in collections of motile agents either alive or synthetic. To this end, the gained  
308 biophysical insights may not only offer new biomedical treatment strategies against the rise of biofilm-  
309 associated antimicrobial resistance but may also contribute to our understanding of development and  
310 cell-fate determination.

311  
312 Following our discovery of stress-induced swarm-to-biofilm transition, we present a detailed  
313 characterization of the initial stage of the transition, namely development of multilayered islands. As  
314 with every discovery, this also brings a host of new questions. For example, it is unclear whether the  
315 molecular mechanisms driving biofilm development from planktonic cells is identical to the one from  
316 swarms. We show the activation of *tasA* gene during the kanamycin-induced transition from swarms to  
317 biofilms, suggesting the commonality between these processes. The expression of biofilm matrix genes  
318 is regulated by various complex pathways, where Spo0A, SinR and AbrB being central regulators  
319 (Vlamakis et al., 2013). If swarms develop biofilms through different pathways, elucidating the  
320 molecular regulatory machinery during the transition from swarm to biofilm may unveil new molecular  
321 pathways regulating biofilm formation. From the perspective of biofilm being a multicellular  
322 adaptation, it would be interesting to determine the stage at which swarming collective loses the ability  
323 to adapt to environmental changes. The biophysical transition that we report here would suggest that  
324 this happens once the ageing swarm cannot be driven anymore to within the putative MIPS region by  
325 the external stressor. Another important question lies in the interplay between biophysical and  
326 molecular mechanisms regulating stress-induced biofilm development. Characterizing the gene  
327 expression profiles in the high-cell-density clusters resulting from multilayered islands, while  
328 simultaneously monitoring the mechanical interactions, would be an important step forward towards  
329 gaining a holistic understanding of collective stress response. We hope that our work will inspire new  
330 research in this area, and look forward to further exciting results in the near future.

331  
332

## 333 **Materials and Methods**

### 334 **Kanamycin gradient assay.**

335 -80°C glycerol stock of *Bacillus subtilis* NCIB3610 wild-type strain (WT) was streaked on a lysogeny-  
336 broth (LB) 1.5% agar plate and grown overnight at 37°C. When specified in figure caption, a genetically  
337 modified strain (listed in Table 1) was used instead of WT. A single colony was picked from this plate  
338 and incubated in 1 ml of liquid LB for 3 h at 37°C. A 4  $\mu$ l inoculum from this culture was placed in the

339 center of a 0.5% LB agar plate supplemented with 2% of glycerol and 0.1 mM MnSO<sub>4</sub> (LBGM  
340 (Shemesh and Chai, 2013)) to favor biofilm formation. A kanamycin diffusive disk (Oxoid™ 30 μg)  
341 was placed on a side of the plate 24 h before inoculation to allow the antibiotic to diffuse at room  
342 temperature. The distance between the inoculum and the kanamycin disk was approximately 3.2 cm,  
343 and plates were incubated for additional 40 h after inoculation at 30°C.  
344

### 345 **Images of swarming plates**

346 Low magnification images of the plates were acquired with a DSLR D5000 Nikon camera (lens AF-S  
347 Micro NIKKOR 40 MM 1.28) in a 30°C incubator. The incubator was covered by black tape to avoid  
348 reflections and the illumination was provided by a white LED placed on a side of the plate. Higher  
349 magnification images (e.g. of the wrinkles) were taken by an Olympus SZ61 microscope by placing the  
350 plates in a dark background with illumination coming from a LED ring attached to the microscope.  
351

### 352 **Quantification of the $P_{tapA-yfp}$ reporter**

353 Biofilm extracellular matrix production was characterized by using a modified strain carrying  $P_{tapA-yfp}$ ,  
354 a fluorescence reporter for the expression of *tapA-sipW-tasA* operon. The kanamycin gradient assay  
355 was repeated by inoculating this strain in LBGM (1.2% and 2% glycerol) swarming agar plates. The  
356 experiment was replicated three times with three different lenses and microscopes: 2x (Nikon Apo  
357 Lambda 2x UW, NA 0.1), 2x (Nikon Plan 2x UW, NA 0.06), 2.5x (Leica 2.5x N PLAN, NA 0.07);  
358 microscopes: two Nikon Eclipse Ti2 and Leica DMI8. Images were taken every half an hour for a period  
359 of ~40 h in a region of 3x9 cm<sup>2</sup> going from the disk to the inoculum. The images were stitched using  
360 the “Grid/Collection stitching” plugin (Preibisch et al., 2009) in Fiji (Schindelin et al., 2012). The  
361 experiment was repeated twice in absence of kanamycin with the first two microscopes and lenses. To  
362 calculate the fluorescent signal, a region of interest was drawn in Fiji surrounding the area where the  
363 wrinkles appeared. The signal was normalized by subtracting the minimum value of pixel intensity  
364 recorded in the time-lapse and dividing by the maximum of the signal for each of the microscopes.  
365

### 366 **Raft and islands sizes**

367 The size of the rafts within the swarm were obtained from three different experiments. A freehand line  
368 drawn with Fiji/imageJ (Schindelin et al., 2012) enclosing the raft was used to measure the area within  
369 the line. Measurements across different positions and time points were used to account for the  
370 variability in raft size within a swarm depending on the position and/or time after expansion begins  
371 (Jeckel et al., 2019). To measure the islands size, timelapses of islands formation in presence and  
372 absence of kanamycin were used. The first frame (just before islands appeared) was subtracted to the  
373 timelapse and then a gaussian filter was applied to remove noise. Finally, the timelapse was threshold  
374 and the initial size of the islands was measured by ‘regionprops’ in Matlab.  
375

### 376 **Characterization of island formation.**

377 We characterized the double layer using 2x (Nikon Plan 2x UW, NA 0.06), 2.5x (Leica 2.5x N PLAN,  
378 NA 0.07) and 10x (Nikon 10x PLAN FLUOR PH2 DLL, NA 0.3) magnifications in two different  
379 microscopes, Nikon Eclipse Ti2 and Leica DMI8. The images were acquired every 2 min in the Nikon  
380 Eclipse Ti2 and every 1 min in the Leica DMI8 using brightfield illumination. Cell motility and cell  
381 density were recorded with a 40x objective (Nikon 40x LWD, NA 0.55) at 37°C. Cell motility was  
382 measured by adapting a Particle Image Velocimetry (PIV) code written in Matlab (Sveen, 2004). The  
383 surface coverage was measured by thresholding the images and dividing the area covered by bacteria  
384 by the total area of our field of view. The threshold was set by using the command ‘imbinarize’ in  
385 Matlab and adapting the sensitivity of its threshold to account for the best estimate of cells in the field  
386 of view.  
387

### 388 **Near UV experiments.**

389 Bacteria were irradiated by near UV-Violet light for 30 s using the inverted microscope DMI8 (Leica  
390 Microsystems) and the LED light source, SOLA SM II Light Engine (Lumencor), with an excitation



391 filter 400/16 using a 40x objective (Leica 40x PH2 HC PL FLUO, NA 0.6) for approximately 3.5  
392 minutes at an intensity of 1.2 to 5.3 mW/mm<sup>2</sup>. The light intensities were measured by placing a  
393 photodiode power sensor (Thorlabs S120C) on the microscope stage. To irradiate a larger area than the  
394 one with the epi-fluorescence set up, a Thorlabs 405 nm light LED was coupled to a cage cube (see  
395 Table S1 for details about the components of the set up). The light coming from the LED was  
396 concentrated by an aspheric condenser lens and reflected by a 45° dichroic mirror towards the sample.  
397 The area illuminated is roughly a circle of 2.5 mm radius at an intensity of 1.5 mW/mm<sup>2</sup>. The surface  
398 coverage was calculated by binarizing the time lapses applying a locally adaptive threshold in Matlab.  
399 The sensitivity of such threshold was changed along the time lapse when cell density was rapidly  
400 increasing and the same value of the threshold could not account for the total number of particles.  
401 The trajectories of the swarming bacteria in the phase diagram were calculated by calculating the  $Pe_r$   
402 and the surface coverage as detailed in the previous section. The trajectories are the result of continuous  
403 irradiation with either of the setups previously described. When illuminated by the epifluorescence the  
404 trajectories were plotted until a jam of bacteria was observed in the field of view. When shining UV  
405 from the condenser the trajectories were plotted until bacteria were completely immotile (Fig. S9). Data  
406 for speed and surface coverage of bacteria has been smoothed by the ‘smooth’ function in Matlab.

407

### 408 **Quorum sensing experiments**

409 The same protocol as the explained in ‘kanamycin gradient assay’ was used to proof the swarming  
410 behaviour, the formation of islands and the biofilm development of the two quorum-sensing knockout  
411 strains:  $\Delta opp$  and  $\Delta hprc$ . Formation of islands and biofilm images were taken as explained in previous  
412 sections.

413

### 414 **Phase diagram.**

415 To calculate the phase diagram of rotational Péclet number ( $Pe_r$ ) with respect to surface coverage, time-  
416 lapses of swarming bacteria coming from 6 different experiments were analysed. The ‘jammed bacteria’  
417 data plotted in the diagram (Fig. 4a) were calculated by analysing the 4 s of the time lapse prior to jam  
418 formation. Videos were acquired at 29-33 fps.

419 The average speed within the swarm was calculated as described earlier and used to then calculate the  
420  $Pe_r$ , defined as:

421

$$Pe_r = \frac{u}{LD_r}$$

422

423 Where  $u$  is the average cell speed within the swarm for a given time point,  $L$  is the aspect ratio of the  
424 swimmers calculated to be 3.2 in average and  $D_r$  the rotational diffusivity of the bacteria. The rotational  
425 diffusivity was estimated by comparing our speeds at surface coverage 0.65 with the speeds of the phase  
426 diagram in (van Damme et al., 2019) for the same surface coverage, from which  $D_r$  can be obtained as:

427

$$D_r = \frac{Lu}{Pe_r}$$

428 This gives  $D_r = 0.21 \pm 0.05 \text{ s}^{-1}$ , from an average of 13 different values from 3 independent experiments.  
429 To check whether this result was sensible, we resuspended in water a sample of swimmers from a plate.  
430 Then, we recorded a video of these swimmers for 10 s and calculated  $D_r$  with a tracking code written in  
431 Python (Mosby et al., 2020).  $D_r$  was obtained as the gradient of the angular mean-square displacement  
432 of the tracks and gave a value of  $D_r = 0.35 \text{ s}^{-1}$ . Although this is slightly higher than the previous result,  
433 it should be kept in mind that the former estimate is for cells that are moving on an agar surface, rather  
434 than swimming in a bulk fluid.

435 Notice that, the  $Pe_r$  in Damme *et al* (van Damme et al., 2019) is obtained from instantaneous velocities  
436 of individual particles. In absence of those, we used an effective  $Pe_r$  derived from the local average  
437 velocity within the swarm. This is likely to overestimate the value of  $Pe_r$  of the experimental points.

438

### 439 **Physical barrier**

440 A 3% agarose solution in water was autoclaved and then poured in a Petri dish. Once it solidified, a  
441 rectangular region (6 x 1 cm) was cut out and vertically placed on a molten swarming liquid LBGM  
442 (0.5% agar). Once it solidified, swarming bacteria were inoculated in the centre of the plate. Videos of  
443 the formation of islands were recorded under 2x (Nikon Plan 2x UW, NA 0.06) in a Nikon Eclipse Ti2  
444 microscope.

445

#### 446 **Biofilm inhibition assay**

447 4  $\mu\text{l}$  of the antibiotic kanamycin coming from four different stocks with the next concentrations: 50,  
448 37.5, 25 and 12.5  $\mu\text{g}/\mu\text{l}$  were added to four different diffusive disks. These diffusive disks were placed  
449 on a side of LBGM 0.5% agar plate for 24 h. After bacteria inoculation, the plates were incubated in a  
450 30°C incubator for roughly 5 h until the swarming front halted. Then, additional 4  $\mu\text{l}$  of the next stock  
451 concentrations of kanamycin were added to the initial ones: 0, 12.5, 25 and 37.5  $\mu\text{g}/\mu\text{l}$  so the total  
452 amount of kanamycin administered was kept constant and equal to 200  $\mu\text{g}$ .

453

#### 454 **Wrinkle wavelength quantification**

455 To measure the wavelength of the wrinkles we calculated the interdistance of nearest parallel wrinkles.  
456 When this was not possible, the wavelength was estimated by calculating the autocorrelation function  
457 of image intensity in space using a Fiji macro made by Michael Schmid  
458 (<https://imagej.nih.gov/ij/macros/RadiallyAveragedAutocorrelation.txt>) (2008) and then fitting the  
459 decay of that function to a double exponential of the form:

$$460 f(x) = ae^{bx} + ce^{dx}.$$

461 Here, the two characteristic wavelengths (1/b and 1/d) correspond to the image noise and the actual  
462 wrinkle wavelength respectively.

463

#### 464 **Statistics**

465 Data are reported as Mean  $\pm$  s.e.m. calculated from at least 3 independent experiments unless otherwise  
466 indicated.

467

468

#### 469 **References**

- 470 Arlt, J., Martinez, V.A., Dawson, A., Pilizota, T., and Poon, W.C.K. (2018). Painting with light-  
471 powered bacteria. *Nat. Commun.* 9, 768.
- 472 Asally, M., Kittisopikul, M., Rue, P., Du, Y., Hu, Z., Cagatay, T., Robinson, A.B., Lu, H., Garcia-  
473 Ojalvo, J., and Suel, G.M. (2012). Localized cell death focuses mechanical forces during 3D  
474 patterning in a biofilm. *Proc. Natl. Acad. Sci.* 109, 18891–18896.
- 475 Barré, J., Chérite, R., Muratori, M., and Peruani, F. (2015). Motility-Induced Phase Separation of  
476 Active Particles in the Presence of Velocity Alignment. *J. Stat. Phys.* 158, 589–600.
- 477 Bartolini, A., Tempesti, P., Ghobadi, A.F., Berti, D., Smets, J., Aouad, Y.G., and Baglioni, P. (2019).  
478 Liquid-liquid phase separation of polymeric microdomains with tunable inner morphology:  
479 Mechanistic insights and applications. *J. Colloid Interface Sci.* 556, 74–82.
- 480 Be'er, A., and Ariel, G. (2019). A statistical physics view of swarming bacteria. *Mov. Ecol.* 7.
- 481 Bechinger, C., Di Leonardo, R., Löwen, H., Reichhardt, C., Volpe, G., and Volpe, G. (2016). Active  
482 Particles in Complex and Crowded Environments. *Rev. Mod. Phys.* 88, 045006.
- 483 Benarroch, J.M., and Asally, M. (2020). The Microbiologist's Guide to Membrane Potential  
484 Dynamics. *Trends Microbiol.* 28, 304–314.
- 485 Bhattacharyya, S., Walker, D.M., and Harshey, R.M. (2020). Necrosignaling: Cell death triggers  
486 antibiotic survival pathways in bacterial swarms. *BioRxiv* 2020.02.26.966986.
- 487 Butler, M.T., Wang, Q., and Harshey, R.M. (2010). Cell density and mobility protect swarming  
488 bacteria against antibiotics. *Proc. Natl. Acad. Sci.* 107, 3776–3781.
- 489 Cairns, L.S., Hogley, L., and Stanley-Wall, N.R. (2014). Biofilm formation by *Bacillus subtilis*: new  
490 insights into regulatory strategies and assembly mechanisms. *Mol. Microbiol.* 93, 587–598.
- 491 Cates, M.E. (2012). Diffusive transport without detailed balance in motile bacteria: does  
492 microbiology need statistical physics? *Reports Prog. Phys.* 75, 42601.
- 493 Cates, M.E., and Tailleur, J. (2015). Motility-Induced Phase Separation. *Annu. Rev. Condens. Matter*

- 494 Phys. *6*, 219–244.
- 495 Cates, M.E., Marenduzzo, D., Pagonabarraga, I., and Tailleur, J. (2010). Arrested phase separation in  
496 reproducing bacteria creates a generic route to pattern formation. *Proc. Natl. Acad. Sci.* *107*,  
497 11715–11720.
- 498 Chu, E.K., Kilic, O., Cho, H., Groisman, A., and Levchenko, A. (2018). Self-induced mechanical  
499 stress can trigger biofilm formation in uropathogenic *Escherichia coli*. *Nat. Commun.* *9*.
- 500 Costerton, J.W. (1999). Bacterial Biofilms: A Common Cause of Persistent Infections. *Science* *284*,  
501 1318–1322.
- 502 van Damme, R., Rodenburg, J., van Roij, R., and Dijkstra, M. (2019). Interparticle torques suppress  
503 motility-induced phase separation for rodlike particles. *J. Chem. Phys.* *150*, 164501.
- 504 Daniels, R., Vanderleyden, J., and Michiels, J. (2004). Quorum sensing and swarming migration in  
505 bacteria. *FEMS Microbiol. Rev.* *28*, 261–289.
- 506 Digregorio, P., Levis, D., Suma, A., Cugliandolo, L.F., Gonnella, G., and Pagonabarraga, I. (2018).  
507 Full Phase Diagram of Active Brownian Disks : From Melting to Motility-Induced Phase  
508 Separation. *Phys. Rev. Lett.* *121*, 98003.
- 509 Epstein, A.K., Pokroy, B., Seminara, A., and Aizenberg, J. (2011). Bacterial biofilm shows persistent  
510 resistance to liquid wetting and gas penetration. *Proc. Natl. Acad. Sci.* *108*, 995–1000.
- 511 Flemming, H.-C., and Wingender, J. (2010). The biofilm matrix. *Nat. Rev. Microbiol.* *8*, 623–633.
- 512 Frangipane, G., Dell’Arciprete, D., Petracchini, S., Maggi, C., Saglimbeni, F., Bianchi, S.,  
513 Vizsnyiczai, G., Bernardini, M.L., and di Leonardo, R. (2018). Dynamic density shaping of  
514 photokinetic *E. Coli*. *Elife* *7*, 1–14.
- 515 Geyer, D., Martin, D., Tailleur, J., and Bartolo, D. (2019). Freezing a Flock: Motility-Induced Phase  
516 Separation in Polar Active Liquids. *Phys. Rev. X* *9*, 031043.
- 517 Ghosh, P., Ben-Jacob, E., and Levine, H. (2013). Modeling cell-death patterning during biofilm  
518 formation. *Phys. Biol.* *10*, 066006.
- 519 Gonnella, G., Marenduzzo, D., Suma, A., and Tiribocchi, A. (2015). Motility-induced phase  
520 separation and coarsening in active matter. *Elsevier Masson SAS* *16*, 316–331.
- 521 Grant, M.A.A., Waclaw, B., Allen, R.J., and Cicuta, P. (2014). The role of mechanical forces in the  
522 planar-to-bulk transition in growing *Escherichia coli* microcolonies. *J. R. Soc. Interface* *11*.
- 523 Hannezo, E., and Heisenberg, C.-P. (2019). Mechanochemical Feedback Loops in Development and  
524 Disease. *Cell* *178*, 12–25.
- 525 Hoffman, L.R., D’Argenio, D.A., MacCoss, M.J., Zhang, Z., Jones, R.A., and Miller, S.I. (2005).  
526 Aminoglycoside antibiotics induce bacterial biofilm formation. *Nature* *436*, 1171–1175.
- 527 Jeckel, H., Jelli, E., Hartmann, R., Singh, P.K., Mok, R., Totz, J.F., Vidakovic, L., Eckhardt, B.,  
528 Dunkel, J., and Drescher, K. (2019). Learning the space-time phase diagram of bacterial swarm  
529 expansion. *Proc. Natl. Acad. Sci.* *116*, 1489–1494.
- 530 Karsenti, E. (2008). Self-organization in cell biology: A brief history. *Nat. Rev. Mol. Cell Biol.* *9*,  
531 255–262.
- 532 Kearns, D.B. (2010). A field guide to bacterial swarming motility. *Nat. Rev. Microbiol.* *8*, 634–644.
- 533 Kesel, S., Grumbein, S., Tallawi, M., Marel, A., Lieleg, O., and Opitz, M. (2016). Direct Comparison  
534 of Physical Properties of *Bacillus subtilis* NCIB. *Appl. Environ. Microbiol.* *82*, 2424–2432.
- 535 Krasnopeeva, E., Lo, C.J., and Pilizota, T. (2019). Single-Cell Bacterial Electrophysiology Reveals  
536 Mechanisms of Stress-Induced Damage. *Biophys. J.* *116*, 2390–2399.
- 537 De la Fuente-Núñez, C., Reffuveille, F., Fernández, L., and Hancock, R.E.W. (2013). Bacterial  
538 biofilm development as a multicellular adaptation: Antibiotic resistance and new therapeutic  
539 strategies. *Curr. Opin. Microbiol.* *16*, 580–589.
- 540 Lai, S., Tremblay, J., and Déziel, E. (2009). Swarming motility: A multicellular behaviour conferring  
541 antimicrobial resistance. *Environ. Microbiol.* *11*, 126–136.
- 542 Liu, G., Patch, A., Bahar, F., Yllanes, D., Welch, R.D., Marchetti, M.C., Thutupalli, S., and Shaevitz,  
543 J.W. (2019). Self-Driven Phase Transitions Drive *Myxococcus xanthus* Fruiting Body Formation.  
544 *Phys. Rev. Lett.* *122*, 248102.
- 545 Liu, J., Prindle, A., Humphries, J., Gabalda-Sagarra, M., Asally, M., Lee, D.Y.D., Ly, S., Garcia-  
546 Ojalvo, J., and Süel, G.M. (2015). Metabolic co-dependence gives rise to collective oscillations  
547 within biofilms. *Nature* *523*, 550–554.
- 548 Lories, B., Roberfroid, S., Dieltjens, L., De Coster, D., Foster, K.R., and Steenackers, H.P. (2020).  
549 Biofilm Bacteria Use Stress Responses to Detect and Respond to Competitors. *Curr. Biol.* *30*,

- 550 1231-1244.e4.
- 551 Lyons, N.A., and Kolter, R. (2015). On the evolution of bacterial multicellularity. *Curr. Opin.*
- 552 *Microbiol.* *24*, 21–28.
- 553 Mazza, M.G. (2016). The physics of biofilms - An introduction. *J. Phys. D. Appl. Phys.* *49*.
- 554 Meredith, H.R., Srimani, J.K., Lee, A.J., Lopatkin, A.J., and You, L. (2015). Collective antibiotic
- 555 tolerance: Mechanisms, dynamics and intervention. *Nat. Chem. Biol.* *11*, 182–188.
- 556 Mosby, L.S., Polin, M., and Köster, D.V. (2020). A Python based automated tracking routine for
- 557 myosin II filaments. *J. Phys. D. Appl. Phys.*
- 558 Nadezhdin, E., Murphy, N., Dalchau, N., Phillips, A., and Locke, J.C.W. (2020). Stochastic pulsing
- 559 of gene expression enables the generation of spatial patterns in *Bacillus subtilis* biofilms. *Nat.*
- 560 *Commun.* *11*, 1–12.
- 561 Nagórska, K., Ostrowski, A., Hinc, K., Holland, I.B., and Obuchowski, M. (2010). Importance of eps
- 562 genes from *Bacillus subtilis* in biofilm formation and swarming. *J. Appl. Genet.* *51*, 369–381.
- 563 Peruani, F., Klauss, T., Deutsch, A., and Voss-Boehme, A. (2011). Traffic Jams, Gliders, and Bands
- 564 in the Quest for Collective Motion of Self-Propelled Particles. *Phys. Rev. Lett.* *106*, 128101.
- 565 Preibisch, S., Saalfeld, S., and Tomancak, P. (2009). Globally optimal stitching of tiled 3D
- 566 microscopic image acquisitions. *Bioinformatics.*
- 567 Prindle, A., Liu, J., Asally, M., Ly, S., Garcia-Ojalvo, J., and Süel, G.M. (2015). Ion channels enable
- 568 electrical communication in bacterial communities. *Nature* *527*, 59–63.
- 569 Qiu, F., Peng, G., Ginzburg, V. V., Balazs, A.C., Chen, H.-Y., and Jasnow, D. (2001). Spinodal
- 570 decomposition of a binary fluid with fixed impurities. *J. Chem. Phys.* *115*, 3779–3784.
- 571 Romero, D., Aguilar, C., Losick, R., and Kolter, R. (2010). Amyloid fibers provide structural integrity
- 572 to *Bacillus subtilis* biofilms. *Proc. Natl. Acad. Sci.* *107*, 2230–2234.
- 573 Schindelin, J., Arganda-Carreras, I., Frise, E., Kaynig, V., Longair, M., Pietzsch, T., Preibisch, S.,
- 574 Rueden, C., Saalfeld, S., Schmid, B., et al. (2012). Fiji: an open-source platform for biological-
- 575 image analysis. *Nat. Methods* *9*, 676–682.
- 576 Shemesh, M., and Chai, Y. (2013). A combination of glycerol and manganese promotes biofilm
- 577 formation in *Bacillus subtilis* via histidine kinase KinD signaling. *J. Bacteriol.* *195*, 2747–2754.
- 578 Su, P.T., Liao, C.T., Roan, J.R., Wang, S.H., Chiou, A., and Syu, W.J. (2012). Bacterial Colony from
- 579 Two-Dimensional Division to Three-Dimensional Development. *PLoS One* *7*, 1–10.
- 580 Sveen, J.K. (2004). An introduction to MatPIV v. 1.6.1.
- 581 Vicsek, T., Czirók, A., Ben-Jacob, E., Cohen, I., and Shochet, O. (1995). Novel Type of Phase
- 582 Transition in a System of Self-Driven Particles. *Phys. Rev. Lett.* *75*, 1226–1229.
- 583 Vlamakis, H., Aguilar, C., Losick, R., and Kolter, R. (2008). Control of cell fate by the formation of
- 584 an architecturally complex bacterial community. *Genes Dev.* *22*, 945–953.
- 585 Vlamakis, H., Chai, Y., Beaugard, P., Losick, R., and Kolter, R. (2013). Sticking together: building
- 586 a biofilm the *Bacillus subtilis* way. *Nat. Rev. Microbiol.* *11*, 157–168.
- 587 Wang, Y., Wilks, J.C., Danhorn, T., Ramos, I., Croal, L., and Newman, D.K. (2011). Phenazine-1-
- 588 carboxylic acid promotes bacterial biofilm development via ferrous iron acquisition. *J. Bacteriol.*
- 589 *193*, 3606–3617.
- 590 Wedlich-Söldner, R., and Betz, T. (2018). Self-organization: The fundament of cell biology. *Philos.*
- 591 *Trans. R. Soc. B Biol. Sci.* *373*.
- 592 Weitz, S., Deutsch, A., and Peruani, F. (2015). Self-propelled rods exhibit a phase-separated state
- 593 characterized by the presence of active stresses and the ejection of polar clusters. *Phys. Rev. E* *92*,
- 594 012322.
- 595 Xavier, J.B. (2011). Social interaction in synthetic and natural microbial communities. *Mol. Syst.*
- 596 *Biol.* *7*, 1–11.
- 597 Yan, J., Fei, C., Mao, S., Moreau, A., Wingreen, N.S., Košmrlj, A., Stone, H.A., and Bassler, B.L.
- 598 (2019). Mechanical instability and interfacial energy drive biofilm morphogenesis. *Elife* *8*, 1–28.
- 599 Yang, J., Arratia, P.E., Patteson, A.E., and Gopinath, A. (2019). Quenching active swarms: effects of
- 600 light exposure on collective motility in swarming *Serratia marcescens*. *J. R. Soc. Interface* *16*,
- 601 20180960.
- 602 Zhang, W., Seminara, A., Suaris, M., Brenner, M.P., Weitz, D. a, and Angelini, T.E. (2014). Nutrient
- 603 depletion in *Bacillus subtilis* biofilms triggers matrix production. *New J. Phys.* *16*, 015028.
- 604
- 605

606 **Acknowledgements**

607 This research is funded by the MRC Doctoral Training Partnership (MR/N014294/1). MP and MA  
608 acknowledge support from EPSRC grant, Bridging the Gaps initiative (EP/M027503/1). MA  
609 acknowledges BBSRC/EPSRC grant to the Warwick Integrative Synthetic Biology Centre  
610 (BB/M017982/1). We thank Lewis Mosby for his help with estimates of the rotational diffusivity, and  
611 Drs. Darius Köster and Meera Unnikrishnan for their comments to the manuscript.  
612

613 **Figures**

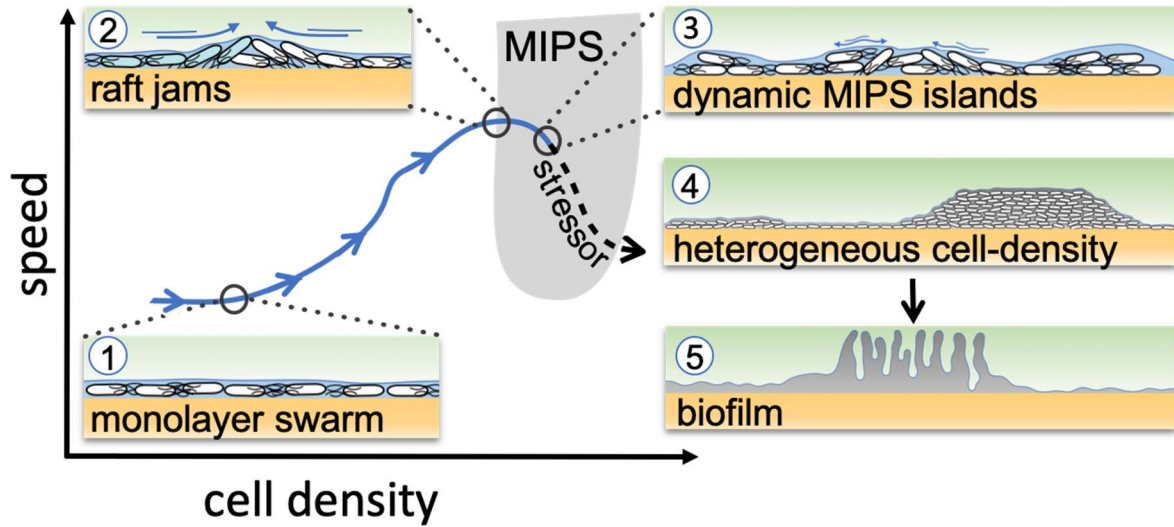

614

615 **Figure 1. Schematic of the transition from swarming to biofilm formation through MIPS.** *B.*  
616 *subtilis* cells swarm in a monolayer (stage 1). As cell density increases, cells form fast-moving rafts  
617 which can collide and form transient jams. Cells at the boundary between the colliding rafts are pushed  
618 upwards and protrude from the surrounding monolayer (stage 2). Further increase in surface coverage  
619 can promote the formation of dynamic MIPS-like islands where cells accumulate within the swarm  
620 while still being dynamic (stage 3). Eventually, this uneven distribution of cell density gives rise to  
621 macroscopic spatial cell-density heterogeneity in cell density (stage 4), which can lead to the formation  
622 of biofilms (stage 5).

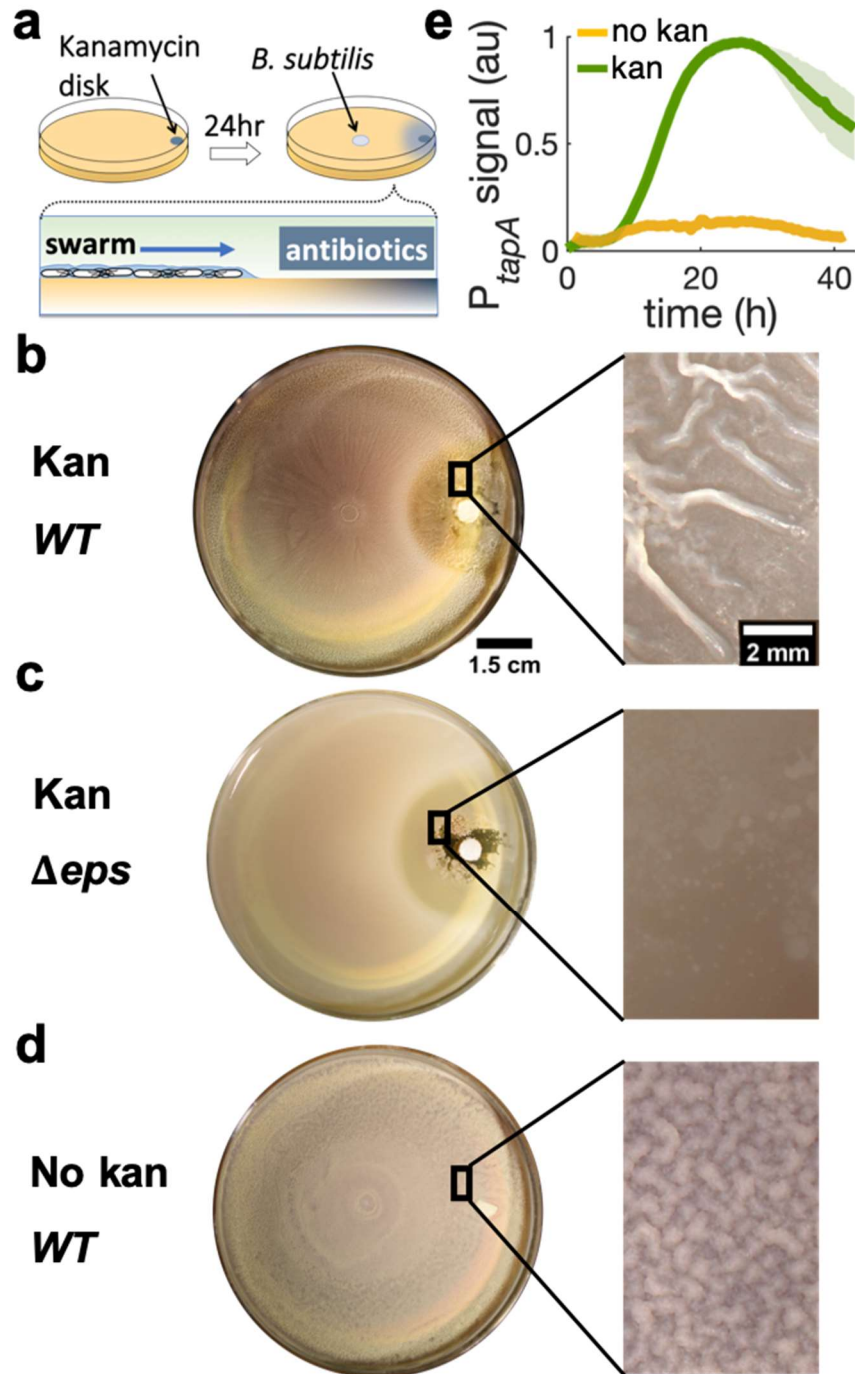

623

624 **Figure 2. Swarming cells transit into biofilm in presence of kanamycin gradient.**

625 a) Schematics of swarming bacteria expanding from the center of a 9 cm Petri dish towards a kanamycin  
626 diffusive disk. Kanamycin disk was placed for 24 hours to form a spatial gradient (Fig. S1). b, c, d)  
627 Swarming *B. subtilis* plates after 40h incubation. Wrinkles are formed at the region ~2 cm away from  
628 disk with b) wildtype (WT), but not with c)  $\Delta eps$  deletion strain. d) WT swarming plate with a diffusive  
629 disk without antibiotics. Zoomed images show the colony surface. e) Mean fluorescence intensity of  
630  $P_{tapA}\text{-}\gamma fp$  for the front of the plate in presence (green) and absence of kanamycin (yellow). The mean  
631 was taken from three independent experiments in the kanamycin case and two independent experiments  
632 in absence of kanamycin. The shady areas represent the s.e.m.

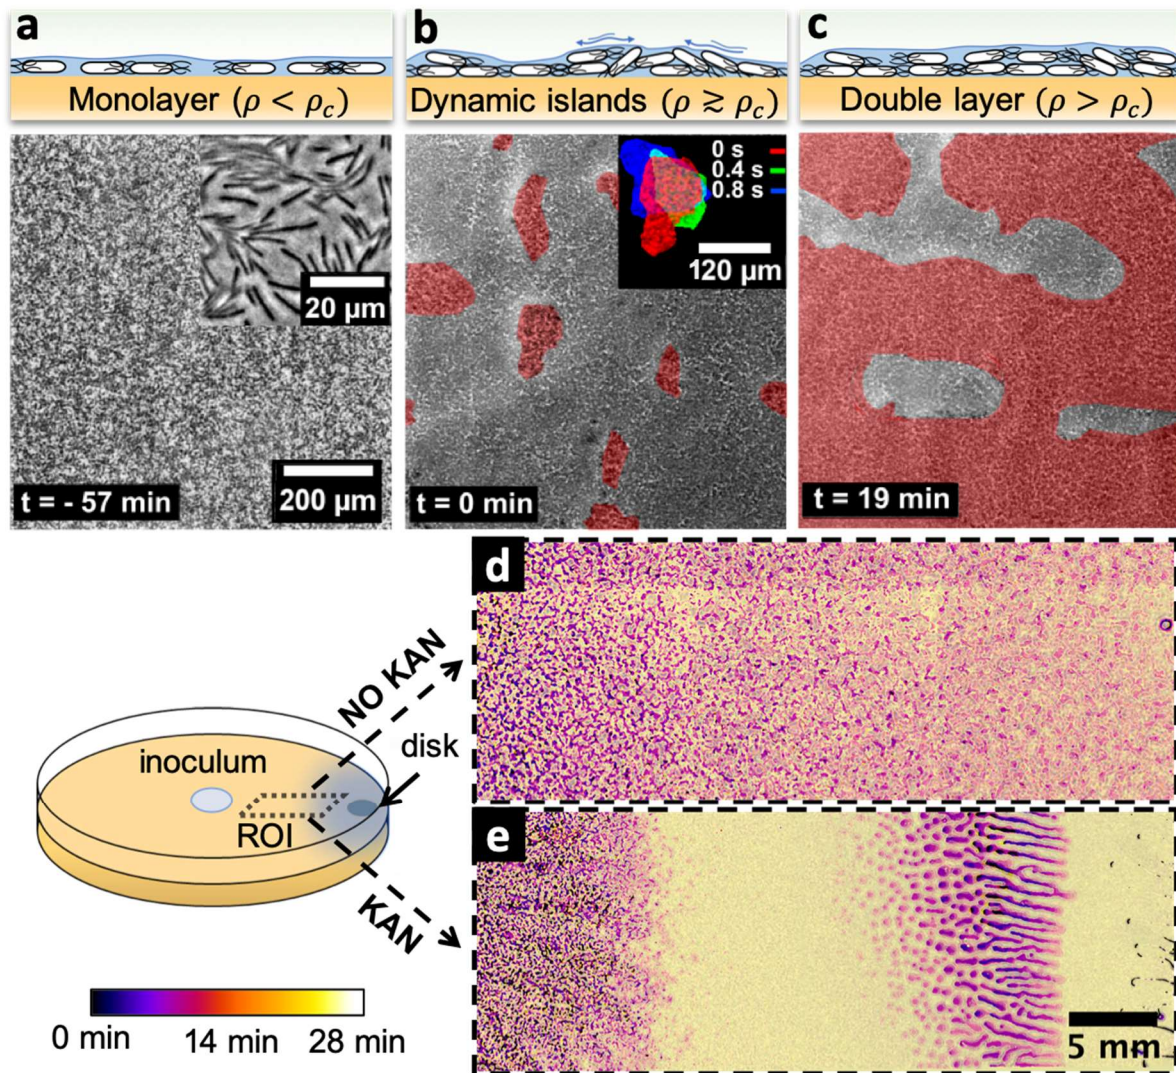

633  
634

635 **Figure 3. Swarming bacteria form patterned multi-layer regions in presence of kanamycin.**

636 a, b, c) Microscopy images of swarming bacteria and side-view illustrations at different levels of cell  
637 density ( $\rho$ ). Timestamp is relative to the formation of dynamic multi-layer islands. a) When cell density  
638 is below a threshold  $\rho_c$ , cells swarm in a monolayer. Image is 57 minutes prior to islands formation.  
639 Inset is a zoomed image showing swarming rafts. b) Increase in cell density leads to formation of  
640 second layers, highlighted in pseudo red. These islands are highly dynamic, and cells are motile. The  
641 shape of the islands changes dynamically within one second (insert). See also Supplementary Video 4.  
642 c) Over time, the islands increase their size and merge together to double-layered regions (shown in  
643 red), coexisting with mono-layered regions. Double layered regions are seen darker than mono layered  
644 regions. d, e) Images of swarming colony with and without kanamycin. Diagram illustrates the regions  
645 of interest (ROI) used for panels. The dynamics of island formation are colour coded using the lookup  
646 table. The origin of times is the appearance of island. See also Supplementary Video 6. d) In the absence  
647 of kanamycin, multilayer regions are much grainier with no clear patterns of propagation. e) In the  
648 presence of kanamycin, multi-layered regions have a defined pattern, starting from the regions closer  
649 to kanamycin to form an elongated shape. These regions appear predominantly at  $\sim 7$  mm away from  
650 kanamycin.

651



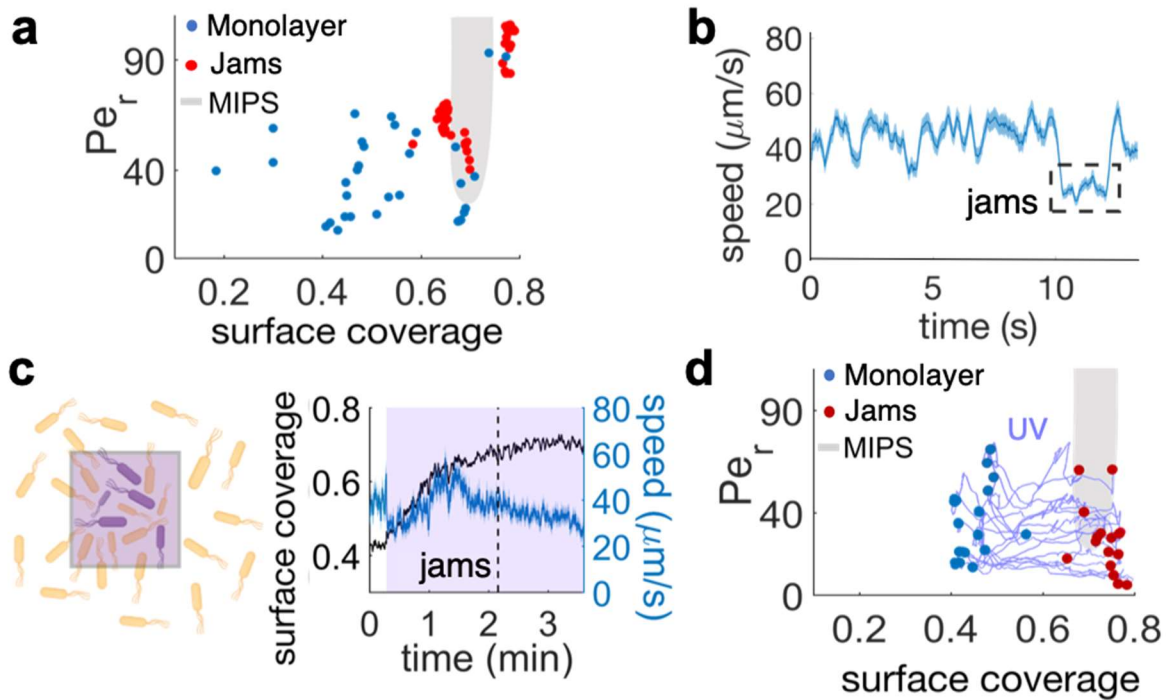

652

653 **Figure 4. The interplay between cell density and cell speed primes jamming and multi-layer**  
 654 **formation.**

655 a) Phase diagram of surface coverage and the rotational Peclet number ( $Pe_r$ ).  $Pe_r$  is proportional to the  
 656 cell motility speed (see Methods). Greyed region depicts motility-induced phase separation (MIPS)  
 657 heterogeneity. Each data point represents a result of a 4-sec single-cell time-lapse microscopy data. The  
 658 time-lapse data in which jamming events are observed are shown in red (see Supplementary Video 3).  
 659 Jams appear exclusively under the condition near the border of MIPS region. b) The speed of motile  
 660 cells drops by half during jamming (highlighted by dashed rectangle). Increase in jamming events lead  
 661 to formation of islands (see Fig.2 and Supplementary Video 4). c, left) Illustrative diagram showing the  
 662 accumulation of cells by UV irradiation. Cell speeds drop within the irradiated region (show by purple  
 663 square), which elevates the surface coverage. c, right) UV irradiation elevates surface coverage. Graph  
 664 shows the dynamics of surface coverage (black) and cell speed (cyan). Magenta is the period with UV  
 665 light illumination ( $1.2 \text{ mW/mm}^2$ ). Vertical dashed line shows a jamming event. d) Time evolution  
 666 trajectories of surface coverage and rotational Peclet number with UV illumination experiment. Blue  
 667 dots are before UV illumination and red dots are when jams appear. Increasing surface coverage by UV  
 668 induces formation of jams at the border to MIPS region (grey).

669

670

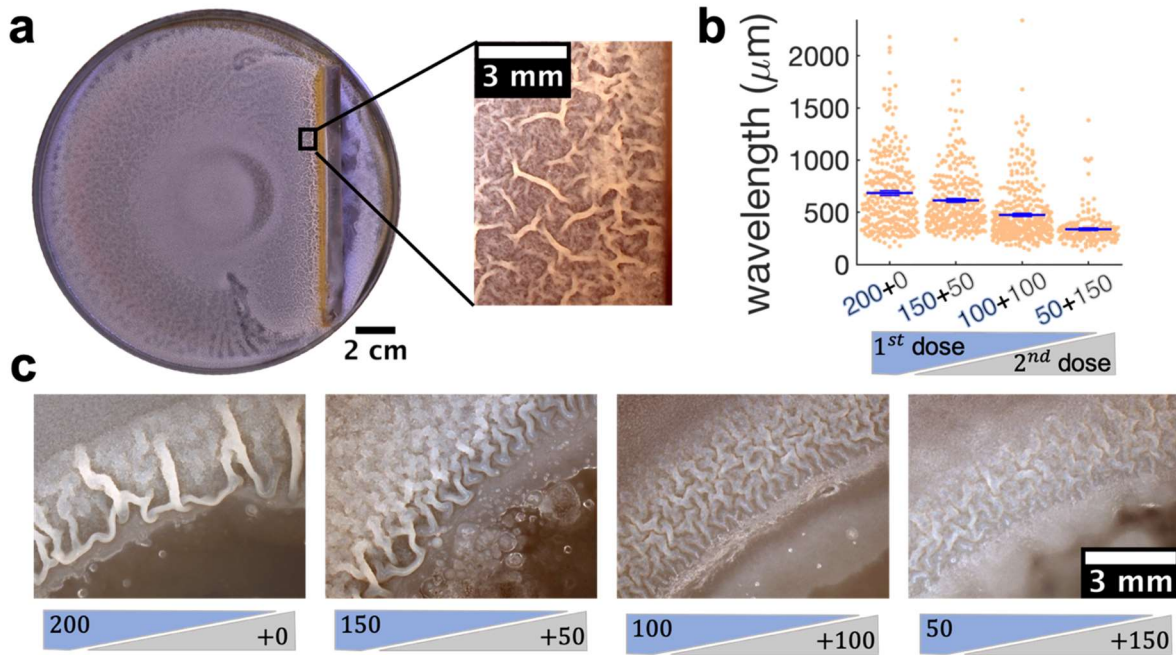

671

672 **Figure 5. Locally increasing cell density is sufficient in inducing wrinkle formation, which can be**  
673 **inhibited by sequential administration of kanamycin.**

674 a) A physical barrier placed on agar triggers wrinkle formation. Wrinkles are formed at the region close  
675 to the barrier. A plate was incubated for 40 hours as in Figure 1. b, c) Kanamycin was sequentially  
676 administered in two different doses to a disk while keeping the total to be 200  $\mu\text{g}$ . The first  
677 administration was added as in other experiments, while the second was added to the disk when the  
678 islands were about to appear. b) The wavelengths of wrinkles with respect to the doses of first (blue  
679 font) and second (gray font) administrations ( $\mu\text{g}$ ). c) Microscopy images of wrinkles induced by  
680 kanamycin. The first dose is in the blue shade and the second dose in the grey shade. Even when the  
681 total dose is kept the same, equal or greater 2<sup>nd</sup> dose inhibits biofilm formation.

682

683
